# Prediction of future cognitive decline among cognitively unimpaired individuals using measures of soluble phosphorylated tau or tau tangle pathology

Rik Ossenkoppele\*<sup>#1-3</sup>, Gemma Salvadó\*<sup>1</sup>, Shorena Janelidze<sup>1</sup>, Alexa Pichet Binette<sup>1</sup>, Divya Bali<sup>1</sup>, Linda Karlsson<sup>1</sup>, Sebastian Palmqvist<sup>1,4</sup>, Niklas Mattsson-Carlgrén<sup>1,5,6</sup>, Erik Stomrud<sup>1,4</sup>, Joseph Theriault<sup>7,8</sup>, Nesrine Rahmouni<sup>7,8</sup>, Pedro Rosa-Neto<sup>7,8</sup>, Emma M. Coomans<sup>2,3</sup>, Elsmarieke van de Giessen<sup>3,9</sup>, Wiesje M. van der Flier<sup>2,3,10</sup>, Charlotte E. Teunissen<sup>3,11</sup>, Erin M. Jonaitis<sup>12,13</sup>, Sterling C. Johnson<sup>12,13</sup>, PREVENT-AD Research Group, Sylvia Villeneuve<sup>14,15</sup>, Tammie L.S. Benzinger<sup>16,17</sup>, Suzanne E. Schindler<sup>17,18</sup>, Randall J. Bateman<sup>17-19</sup>, James D. Doecke<sup>20</sup>, Vincent Dore<sup>20,21</sup>, Azadeh Feizpour<sup>21,22</sup>, Colin L. Masters<sup>22</sup>, Christopher Rowe<sup>21,22</sup>, Heather J. Wiste<sup>23</sup>, Ronald C. Petersen<sup>24</sup>, Clifford R. Jr. Jack<sup>25</sup> & Oskar Hansson<sup>#1,4</sup>

<sup>1</sup> Clinical Memory Research Unit, Department of Clinical Sciences in Malmö, Lund University, Lund, Sweden, <sup>2</sup> Alzheimer Center Amsterdam, Neurology, Vrije Universiteit Amsterdam, Amsterdam UMC location VUmc, Amsterdam, The Netherlands, <sup>3</sup> Amsterdam Neuroscience, Neurodegeneration, Amsterdam, The Netherlands, <sup>4</sup> Memory Clinic, Skåne University Hospital, Malmö, Sweden, <sup>5</sup> Department of Neurology, Skåne University Hospital, Lund University, Lund, Sweden, <sup>6</sup> Wallenberg Center for Molecular Medicine, Lund University, Lund, Sweden, <sup>7</sup> Translational Neuroimaging Laboratory, McGill Research Centre for Studies in Aging, Montreal, Quebec, Canada, <sup>8</sup> Department of Neurology and Neurosurgery, Faculty of Medicine, McGill University, Montreal, Quebec, Canada, <sup>9</sup> Department of Radiology & Nuclear Medicine, Vrije Universiteit Amsterdam, Amsterdam UMC location VUmc, Amsterdam, The Netherlands, <sup>10</sup> Department of Epidemiology and Biostatistics, Vrije Universiteit Amsterdam, Amsterdam UMC location VUmc, Amsterdam, The Netherlands, <sup>11</sup> Neurochemistry Laboratory, Department of Laboratory Medicine, Vrije Universiteit Amsterdam, Amsterdam UMC location VUmc, Amsterdam, The Netherlands, <sup>12</sup> Wisconsin Alzheimer's Institute, School of Medicine and Public Health, University of Wisconsin-Madison, Madison, <sup>13</sup> Wisconsin Alzheimer's Disease Research Center, School of Medicine and Public Health, University of Wisconsin-Madison, Madison, <sup>14</sup> Douglas Mental Health University Institute, Centre for Studies on the Prevention of Alzheimer's Disease (StoP-AD), Montreal, Quebec, Canada, <sup>15</sup> Department of Psychiatry, McGill University, Montreal, Quebec, Canada, <sup>16</sup> Department of Radiology, Washington University School of Medicine, St. Louis, MO, USA, <sup>17</sup> Charles F. and Joanne Knight Alzheimer Disease Research Center, Washington, Washington University School of Medicine, St. Louis, MO, USA, <sup>18</sup> Department of Neurology, Washington University School of Medicine, St. Louis, MO, United States, <sup>19</sup> The Tracy Family SILQ Center, Washington University School of Medicine, St. Louis, MO, United States, <sup>20</sup> Australian eHealth Research Centre, CSIRO, Melbourne, Victoria, Australia, <sup>21</sup> Department of Molecular Imaging & Therapy, Austin Health, Heidelberg, Victoria, Australia, <sup>22</sup> The Florey Institute of Neuroscience and Mental Health, The University of Melbourne, Parkville, Victoria, Australia, <sup>23</sup> Department of Quantitative Health Sciences, Mayo Clinic, Rochester, MN, USA, <sup>24</sup> Department of Neurology, Mayo Clinic, Rochester, MN, USA, <sup>25</sup> Department of Radiology, Mayo Clinic, Rochester, MN, USA.

\* Shared first authors

## # Corresponding authors:

Rik Ossenkoppele ([r.ossenkoppele@amsterdamumc.nl](mailto:r.ossenkoppele@amsterdamumc.nl)), Lund University, Clinical Memory Research Unit, Malmö, Sweden & VU University Medical Center, Department of Neurology and Alzheimer Center, Amsterdam Neuroscience, Amsterdam, the Netherlands.

Oskar Hansson ([oskar.hansson@med.lu.se](mailto:oskar.hansson@med.lu.se)), Lund University, Clinical Memory Research Unit, Malmö, Sweden & Memory Clinic, Skåne University Hospital, Malmö, Sweden.

NOTE: This preprint reports new research that has not been certified by peer review and should not be used to guide clinical practice.

## ABSTRACT

Plasma p-tau217 and Tau-PET are strong prognostic biomarkers in Alzheimer's disease (AD), but their relative performance in predicting future cognitive decline among cognitively unimpaired (CU) individuals is unclear. In this head-to-head comparison study including 9 cohorts and 1534 individuals, we found that plasma p-tau217 and medial temporal lobe Tau-PET signal showed similar associations with cognitive decline on a global cognitive composite test ( $R^2_{\text{PET}}=0.32$  vs  $R^2_{\text{PLASMA}}=0.32$ ,  $p_{\text{difference}}=0.812$ ) and with progression to mild cognitive impairment (Hazard ratio[HR] $_{\text{PET}}=1.56[1.43-1.70]$  vs  $\text{HR}_{\text{PLASMA}}=1.63[1.50-1.77]$ ,  $p_{\text{difference}}=0.627$ ). Combined plasma and PET models were superior to the single biomarker models ( $R^2=0.36$ ,  $p<0.01$ ). Furthermore, sequential selection using plasma p-tau217 and then Tau-PET reduced the number of participants required for a clinical trial by 94%, compared to a 75% reduction when using plasma p-tau217 alone. We conclude that plasma p-tau217 and Tau-PET showed similar performance for predicting future cognitive decline in CU individuals, and their sequential use (i.e., plasma p-tau217 followed by Tau-PET in a subset with high plasma p-tau217) is useful for screening in clinical trials in preclinical AD.

In recent years, there has been a substantial increase in the availability of biomarkers that reflect the core Alzheimer's disease (AD) neuropathological hallmarks, specifically Amyloid- $\beta$  (A $\beta$ ) plaques and tau neurofibrillary tangles.<sup>1</sup> Tau-PET has shown excellent diagnostic accuracy and strong associations with both concurrent and longitudinal cognitive decline, outperforming established AD biomarkers like Amyloid-PET and structural MRI across the clinical continuum of AD.<sup>1-7</sup> However, Tau-PET is expensive and labor intensive, has inadequate availability and its sensitivity to detect the earliest stages of tau aggregation is limited. This is particularly troublesome in individuals with preclinical AD who harbor AD pathology but have not (yet) developed symptoms.<sup>8</sup> The recent advent of blood-based biomarkers of AD pathology potentially offers a low cost, non-invasive and scalable alternative.<sup>9</sup> Within the swiftly evolving realm of plasma biomarkers, plasma p-tau217 (phosphorylated-tau at threonine 217) has demonstrated excellent performance in detecting AD pathology, distinguishing between AD and non-AD neurodegenerative disorders, and predicting future clinical progression.<sup>10-16</sup> However, in contrast with Tau-PET, plasma p-tau217 provides no regional information on AD pathology, its continuous values are less representative of the full dynamic range of tau pathology and its signal represents a mix of tau and A $\beta$  pathology and is therefore a less tau-specific biomarker.<sup>17-19</sup> In cognitively impaired individuals, Tau-PET has shown superior performance to plasma p-tau217 in predicting future cognitive decline.<sup>20,21</sup> In cognitively unimpaired (CU) individuals, however, it is yet unclear whether there is a meaningful difference in prognostic utility between Tau-PET and plasma p-tau217 biomarkers.<sup>22</sup> Determining which of the two biomarkers is the strongest predictor of future cognitive deterioration in initially CU individuals is of utmost importance as clinical trials are increasingly recruiting participants with preclinical AD to enable early intervention. This information would become even more crucial if

treatments such as lecanemab<sup>23</sup> and donanemab<sup>24</sup> are found to be effective in preclinical AD, as this would require large-scale screening of CU populations for AD pathology. Therefore, we performed a large-scale head-to-head comparison study between Tau-PET (from which signal was extracted from reporter regions covering the medial temporal lobe [Tau-PET<sub>MTL</sub>] and the temporal neocortex [Tau-PET<sub>NEO</sub>]<sup>5</sup>) vs plasma p-tau217. We assessed their associations with longitudinal cognitive decline and diagnostic progression to mild cognitive impairment (MCI). Additionally, we examined whether and how plasma p-tau217 and Tau-PET can be combined to further increase their prognostic accuracy and to optimize recruitment strategies for clinical trials.

## RESULTS

### *Participants*

We included 1534 CU participants from nine cohorts with Tau-PET and plasma p-tau217 data available at baseline, of whom 413 (26.7%) were A $\beta$ -positive on PET (see **Table-1** and **Extended-Data Table-1** for data by cohort). The mean $\pm$ standard deviation age of the participants was 68.4 $\pm$ 10.0 years, 53.8% were females and the follow-up duration was 3.8 $\pm$ 1.8 years. The associations between Tau-PET and plasma p-tau217 levels were moderate (plasma p-tau217 vs Tau-PET<sub>MTL</sub>,  $\rho$ [95%CI] = 0.42 [0.38-0.46],  $p$ <0.001; plasma p-tau217 vs Tau-PET<sub>NEO</sub>,  $\rho$ =0.34 [0.30- 0.39],  $p$ <0.001, **Extended-Data Figure-1**).

### *Prediction of future decline in cognitive function*

First, we examined across all participants whether the tau biomarkers individually and combined were associated with cognitive decline over time on the modified preclinical Alzheimer cognitive composite (mPACC5). We selected the mPACC5 because it is a

sensitive measure that can reliably detect longitudinal changes over time in CU populations, and is therefore often used as an outcome measure in research studies and clinical trials focusing on preclinical AD.<sup>25,26</sup> mPACC5 slopes were generated using linear mixed effects models and then used as dependent variable in linear regression models adjusting for age, sex, years of education, *APOE*  $\epsilon$ 4 carriership and cohort. The analysis showed that plasma p-tau217 concentrations ( $R^2$ [95%CI]= 0.32 [0.27-0.35], corrected Akaike Information Criterion [AICc]=- 3766), Tau-PET uptake in the medial temporal lobe (Tau-PET<sub>MTL</sub>,  $R^2$ = 0.32 [0.27-0.36], AICc= -3773 and Tau-PET uptake in the temporal neocortex (Tau-PET<sub>NEO</sub>,  $R^2$ = 0.31 [0.25-0.35], AICc= -3751) were all better predictors of longitudinal cognitive decline than basic models that included age, sex, education and cohort with *APOE*  $\epsilon$ 4 status ( $R^2$ = 0.24 [0.20-0.27], AICc= -3617) or without *APOE*  $\epsilon$ 4 status ( $R^2$ = 0.23 [0.19-0.26], AICc= -3603) (**Figure-1a-b, Extended-Data Table-2/3**). There were no significant differences between single biomarker models, i.e. between plasma p-tau217 and Tau-PET<sub>MTL</sub> ( $p$ =0.812), between plasma p-tau217 and Tau-PET<sub>NEO</sub> ( $p$ =0.699), and between Tau-PET<sub>MTL</sub> and Tau-PET<sub>NEO</sub> ( $p$ =0.404). Combined biomarker models, i.e., plasma p-tau217 and Tau-PET<sub>MTL</sub> ( $R^2$ = 0.36 [0.30-0.40], AICc= -3849) and plasma p-tau217 and Tau-PET<sub>NEO</sub> ( $R^2$ = 0.35 [0.29-0.40], AICc= -3841) were more strongly associated with longitudinal mPACC5 decline than the single biomarker models (all  $p$ <0.01). The relative contribution of each biomarker in the combined models further indicated their complementary value, as e.g., in the combined plasma p-tau217 and Tau-PET<sub>MTL</sub> model, of all explained mPACC5 variance 15% was explained by plasma p-tau217 alone, 17% by Tau-PET<sub>MTL</sub> alone, 24% was shared variance and the remaining 43% was explained by covariates (**Figure-1c, Extended-Data Table-4**). The results were overall consistent across cohorts (**Extended-Data Figure-2/3 and Extended-Data Table-5**).

Next, we repeated the same set of analyses with mPACC5 as the outcome measure in Amyloid-PET positive CU individuals only (n=379). This analysis yielded a largely similar pattern compared to analyses in the entire sample (**Figure-1d-e, Extended-Data Table-2/3**). The single biomarker models including plasma p-tau217 ( $R^2= 0.30$  [0.19-0.36], AICc= -497), Tau-PET<sub>MTL</sub> ( $R^2= 0.33$  [0.22-0.40], AICc= -515) or Tau-PET<sub>NEO</sub> ( $R^2= 0.35$  [0.22-0.43], AICc= -523) outperformed the basic models with and without *APOE*  $\epsilon 4$  status ( $R^2=0.16$ [0.07-0.21], AICc= -428 for both). Further, there were no differences between the three single biomarker models (plasma p-tau217 vs Tau-PET<sub>MTL</sub>,  $p=0.344$ ; plasma p-tau217 vs Tau-PET<sub>NEO</sub>,  $p=0.287$ ; Tau-PET<sub>MTL</sub> vs Tau-PET<sub>NEO</sub>,  $p=0.693$ ). Also, combined biomarker models, i.e., plasma p-tau217 and Tau-PET<sub>MTL</sub> ( $R^2= 0.38$  [0.27-0.45], AICc= -546) and plasma p-tau217 and Tau-PET<sub>NEO</sub> ( $R^2= 0.39$  [0.27-0.47], AICc= -550), were more strongly associated with longitudinal mPACC5 decline than their respective single biomarker models (both  $p<0.01$ ). Among A $\beta$ -positive CU individuals, the relative contribution of the Tau-PET measures in the combined model was substantially greater than in the entire study population, i.e., Tau-PET<sub>MTL</sub> 34% vs 17% and Tau-PET<sub>NEO</sub> 58% vs 15%, which was not the case for plasma p-tau217 (15% vs 17%, **Figure-1c-f, Extended-Data Table-4**).

#### *Prediction of clinical progression to Mild Cognitive Impairment (MCI)*

Next, we examined across all participants whether the tau biomarkers individually and combined were associated with the rate of clinical progression to MCI using Cox proportional hazard models, adjusting for age, sex, years of education, cohort and *APOE*  $\epsilon 4$  carriership. The analysis revealed that higher baseline plasma p-tau217 (Hazard ratio[HR]= 1.57 [1.44-1.71], AICc= 2099), Tau-PET<sub>MTL</sub> (HR= 1.63 [1.50-1.77], AICc=

2077) and Tau-PET<sub>NEO</sub> (HR= 1.42 [1.33-1.51], AICc= 2111) levels were all associated with an increased risk for future progression to MCI (all  $p < 0.001$ , **Figure-2a-b, Extended-Data Table-6/7**). The individual fluid vs neuroimaging tau biomarker models did not differ from each other (plasma p-tau217 vs Tau-PET<sub>MTL</sub>,  $p = 0.340$ ; plasma p-tau217 vs Tau-PET<sub>NEO</sub>,  $p = 0.571$ ), while the performance of Tau-PET<sub>MTL</sub> was slightly better than that of Tau-PET<sub>NEO</sub> ( $p = 0.046$ ). The fit was improved for the plasma p-tau217 model when adding Tau-PET<sub>MTL</sub> ( $\Delta AICc = -52$ ,  $p = 0.005$ ) or Tau-PET<sub>NEO</sub> ( $\Delta AICc = -30$ ,  $p = 0.018$ , **Extended-Data Table-6/8**). Likewise, the model fit also improved when adding plasma p-tau217 to Tau-PET<sub>MTL</sub> ( $\Delta AICc = -30$ ,  $p = 0.007$ ) and to Tau-PET<sub>NEO</sub> ( $\Delta AICc = -42$ ,  $p = 0.001$ ). The results were largely consistent across cohorts (**Extended-Data Figure-4/5**).

When repeating the same set of analyses in A $\beta$ -positive CU individuals only ( $n = 403$ ), we found a largely similar pattern (**Figure-2c-d, Extended-Data Table-6/7**). Baseline plasma p-tau217 (HR= 1.56 [1.37-1.77], AICc= 1133), Tau-PET<sub>MTL</sub> (HR= 1.54 [1.39-1.70], AICc=1109) and Tau-PET<sub>NEO</sub> (HR= 1.34 [1.25-1.43], AICc= 1126) levels were all associated with an increased risk for future progression to MCI (all  $p < 0.001$ ). The individual Tau biomarker models did not differ from each other (plasma p-tau217 vs Tau-PET<sub>MTL</sub>,  $p = 0.270$ ; plasma p-tau217 vs Tau-PET<sub>NEO</sub>,  $p = 0.754$ ; Tau-PET<sub>MTL</sub> vs Tau-PET<sub>NEO</sub>,  $p = 0.244$ ). Adding Tau-PET to plasma p-tau217 models improved the model fit when adding Tau-PET<sub>MTL</sub> ( $\Delta AICc = -41$ ,  $p = 0.002$ ) and Tau-PET<sub>NEO</sub> ( $\Delta AICc = -25$ ,  $p = 0.03$ , **Extended-Data Table-6/8**). The model fit also slightly improved when adding plasma p-tau217 to either Tau-PET<sub>MTL</sub> ( $\Delta AICc = -17$ ,  $p = 0.043$ ) or Tau-PET<sub>NEO</sub> ( $\Delta AICc = -18$ ,  $p = 0.049$ ).

### *A two-step approach to reduce the sample size in clinical trials*

Then we tested whether and how a two-step sequential approach (i.e., plasma p-tau217 followed by Tau-PET) could reduce the number of participants needed for a preclinical AD trial using longitudinal changes in cognitive function as primary outcome. Significant sample size reductions can already be achieved in the first step, i.e., using only plasma p-tau217. When using the mPACC5 as outcome measure, assuming 80% power and  $\alpha=0.05$  in a 4-year clinical trial with annual repeated testing, selecting participants with plasma p-tau217 levels in Quartiles 2-4 (i.e., Q2-4, excluding the lowest 25% of plasma p-tau217) would result in a 32[14-41]% reduction of the number of required participants compared to including the entire study population (**Figure-3**). Selecting participants in plasma p-tau217 Q3-4 and Q4 further reduced the required sample size by 63[48-69]% and 81[72-86]%, respectively. Using clinical progression to MCI as an outcome measure yielded similar results, i.e., plasma p-tau217 Q2-4: 29[22-36]%, Q3-4: 56[48-63]% and Q4: 82[76-87]%, **Figure-4**. In the second step, Tau-PET measures further reduced the required sample size. For example, in the population with plasma p-tau217 concentrations in Quartiles 3-4, selecting participants with Tau-PET in Quartile 4 would further reduce the sample size from 63[48-69]% (plasma p-tau217) to 89[82-91]% (Tau-PET<sub>MTL</sub>, **Figure-3**) or to 85[77-89]% (Tau-PET<sub>NEO</sub>, **Extended Figure-6**) when using the mPACC5 as the outcome measure. Another example, in the population with plasma p-tau217 concentrations in Quartile 4, selecting participants with Tau-PET in Quartiles 3-4 would further reduce the sample size 82[76-87]% (plasma p-tau217) to 88[82-94]% (Tau-PET<sub>MTL</sub>, **Figure-4**) or to 94[91-97]% (Tau-PET<sub>NEO</sub>, **Extended Figure-7**) when using clinical progression to MCI as the outcome measure. The estimated sample size reductions for all plasma p-tau217 and Tau-PET quartile combinations are presented in **Extended Table-9**. Repeating the same set of analyses but now restricted to A $\beta$ -positive



CU individuals showed that similarly large sample size reductions can be achieved in this population (**Extended Figure-8**).

#### *Characterization of different combined plasma p-tau217 and Tau-PET groups*

Finally, we aimed to characterize the groups resulting from combining different plasma p-tau217 and Tau-PET<sub>MTL</sub> quartiles in terms of A $\beta$ -positivity, rates of mPACC5 decline and progression to MCI, as well as the number of participants that would be included based on each combination relative to the full dataset. For this purpose, we created four different groups based on increasingly restrictive tau biomarker combinations: A) a “liberal” group consisting of participants with plasma p-tau217 levels in Q2-Q4 and then Tau-PET<sub>MTL</sub> uptake in Q2-Q4 of those selected by plasma, B) a “moderate” group consisting of plasma p-tau217 levels in Q3-Q4 and then Tau-PET<sub>MTL</sub> uptake in Q3-Q4, C) a “plasma p-tau217 Q4 only” group consisting of individuals with plasma p-tau217 levels in Q4 regardless of Tau-PET, and D) a “conservative” group consisting of plasma p-tau217 levels in Q4 and then Tau-PET<sub>MTL</sub> uptake in Q4. **Figure-5a-c** indicates a progressively worse outcome for individuals from approach A to D, with an increasing proportion of A $\beta$ -positive individuals from the liberal (A) to the conservative (D) threshold approach (from 39.8% to 95.6%), more rapid decline on the mPACC5 (from standardized- $\beta$ = -0.06 $\pm$ 0.09 to -0.15 $\pm$ 0.12) and a greater proportion of CU individuals who progressed to MCI (from 17.0% to 40.1%). Furthermore, the proportion of participants that would be included in a hypothesized clinical trial with the mPACC5 as an outcome measure decreased from 56.2% (of the entire population) when using the liberal threshold approach to only 6.2% when using the conservative threshold approach (**Figure-5d**). Notably, there were no group differences between the plasma p-tau217 Q4-only approach vs the moderate combined threshold approach for mPACC5 decline

(standardized- $\beta$ =  $-0.09\pm 0.10$  vs  $-0.09\pm 0.10$ ), proportion with progression to MCI (26.0% vs 26.5%) and the proportion of participants selected (25.0% vs 25.0%), and only a modest difference in A $\beta$ -positivity (i.e., 61.4% vs 71.7%). The same set of analyses using Tau-PET<sub>NEO</sub> instead of Tau-PET<sub>MTL</sub> yielded similar results (**Extended Figure-9**). Detailed group characterizations for all the other possible combinations are presented in **Extended Table-10** (i.e., A $\beta$ -positivity, mPACC5 decline and clinical progression) and **Extended Table-11** (i.e., age, sex, *APOE* status and years of education).

We also calculated the projected costs that could be saved in a hypothetical trial with mPACC5 or MCI progression rates as an outcome measure using the same four groups as above. When assuming a 1:15 ratio (i.e., cost of 1 Tau-PET scan equals 15 plasma p-tau217 assessments) and using Tau-PET<sub>MTL</sub>, both the plasma p-tau217 Q4 only (C) group (96.9%) and the conservative combined (D) group (96.5% cost reduction) yielded substantially higher cost reductions compared to the moderate (B) group (85.4%) and especially the liberal (A) group (53.9%) when using mPACC as an endpoint (**Extended Figure-10a**, Tau-PET<sub>NEO</sub> results are presented in **Extended Figure-10b**). Using the same ratio (1:15) but now using clinical progression as the endpoint, the plasma p-tau217 Q4 only (C) group yielded the highest cost reduction (88.2%), followed by the conservative combined (D) group (70.4%), the moderate (B) group (53.0%) the liberal (A) group (25.9%, **Extended Figure-11a**, Tau-PET<sub>NEO</sub> results are presented in **Extended Figure-11b**).

## DISCUSSION

In this multicohort study, we investigated whether Tau-PET or plasma p-tau217 is more strongly associated with future cognitive decline among 1534 CU individuals and

whether they would provide complementary information in screening approaches for clinical trials. This is a timely research question as both tau biomarkers are frequently incorporated into clinical trials, and often in combination as they reflect different aspects of tau pathophysiology. According to the draft revised AD criteria by the Alzheimer's Association Workgroup, plasma p-tau217 is a Core 1 biomarker ( $T_1$ ) of phosphorylated and secreted AD tau, while Tau-PET is a Core 2 biomarker ( $T_2$ ) of AD Tau proteinopathy.<sup>27</sup> In this study, we observed comparably strong associations between plasma p-tau217 and Tau-PET with cognitive decline on a sensitive global cognitive composite test (i.e., mPACC5) and with clinical progression to MCI in CU individuals. Importantly, models including both plasma p-tau217 and Tau-PET consistently outperformed single biomarker models, suggesting that plasma p-tau217 and Tau-PET provide complementary information. Simulations showed that a two-step approach (i.e., plasma p-tau217 first, followed by Tau-PET in individuals with high plasma p-tau217 only) could substantially reduce the number and cost of recruiting participants for a preclinical AD clinical trial with mPACC5 or progression to MCI as the primary endpoint. We conclude that plasma p-tau217 and Tau-PET showed similar associations with future cognitive decline in a CU population, that both tau biomarkers provide complementary information, and that their sequential use (i.e., plasma p-tau217 followed by Tau-PET in a subset with high plasma p-tau217) is useful for screening in clinical trials in preclinical AD.

A main finding of this study is that there were no statistical differences between plasma p-tau217 concentrations and Tau-PET uptake in their associations with future cognitive changes in a CU population. This is in contrast with cognitively impaired populations, where Tau-PET generally outperforms plasma p-tau217 in terms of prognostic

accuracy.<sup>20,21</sup> This discrepancy between disease stages might be explained by the differences in underlying pathophysiology and subsequent temporal dynamics of the two tau biomarkers. Plasma p-tau217 measures the hyperphosphorylated tau protein in soluble forms and has been shown to change very early in the disease process.<sup>28</sup> Post-mortem studies indicated that ante-mortem plasma p-tau217 levels are associated with the density of both neurofibrillary tau tangle and A $\beta$  plaque pathology in the brain.<sup>18,29</sup> It is conceivable that this mix of A $\beta$ - and tau-related signals reflected by plasma p-tau217 levels contributed to its non-inferiority versus Tau-PET for predicting cognitive change over time in this early population. For instance, A $\beta$  toxicity might impact synaptic function or neuroinflammation, which could subsequently influence cognitive performance.<sup>30</sup> In contrast, Tau-PET signal largely represents the presence of aggregated paired helical filaments of the tau protein forming insoluble neurofibrillary tangles.<sup>31</sup> *In vivo* studies have shown that positive Tau-PET scans are relatively rare in CU individuals (i.e., ~5-10% among A $\beta$ -positive CU individuals in a temporal meta-ROI)<sup>3,4</sup> and post-mortem studies have indicated that a positive [<sup>18</sup>F]Flortaucipir Tau-PET scan (quantitatively or by visual read) represents tau pathology in Braak stages IV and above.<sup>32,33</sup> Altogether, this indicates that substantial changes on a Tau-PET scan occur in rather advanced clinical and biological stages of AD, which may explain why Tau-PET in the current mix of A $\beta$ -positive and A $\beta$ -negative CU individuals did not outperform plasma p-tau217 in predicting future cognitive decline. We also observed no marked differences between Tau-PET<sub>MTL</sub> and Tau-PET<sub>NEO</sub>, which may appear contradictory with our previous study where the Tau-PET<sub>NEO</sub>-positive group exhibited a considerably worse prognosis.<sup>34</sup> This discrepancy can be explained by the different group definitions used in the current study (quartile-based) compared to the previous (binary cut-offs). In the previous study, the Tau-PET<sub>NEO</sub> positive group comprised a relatively small proportion

of the overall CU population (~4%). As a result, even in the highest quartile (Q4) of the current study, most individuals are Tau-PET negative. This attenuates the overall association between Tau-PET and cognitive decline, and dilutes the association even further for the Tau-PET<sub>NEO</sub> group.

Since there were no clear distinctions between the two tau biomarkers in individual models, plasma p-tau217 should be prioritized over Tau-PET as a standalone screening tool in CU populations due to its major practical advantages. However, simultaneous modelling of plasma p-tau217 and Tau-PET consistently led to a more accurate forecast of subsequent cognitive decline compared to single biomarker models. We therefore tested a two-step sequential approach, which involved selecting participants based on plasma p-tau217 as the first step and then performing Tau-PET as the second step. This approach decreased the cost of selecting appropriate participants for clinical trials by drastically reducing the number of required Tau-PET scans and participants for screening. This was mainly achieved by selecting from the entire CU study population the subset of individuals that are at highest-risk for short-term cognitive decline due to their elevated levels of both baseline plasma p-tau217 and Tau-PET. In such a workflow (see **Figure-3a**), the participants' eligibility in terms of inclusion (e.g., age, cognitive status) and exclusion (e.g., the absence of major neurological or psychiatric disorders) criteria would be assessed first. Next, participants would be further triaged based on their plasma p-tau217 levels, where "low/negative" participants would not undergo a Tau-PET scan as their risk for future cognitive decline would be low, while "high/positive" participants would undergo a Tau-PET scan to further refine their risk profile.<sup>35</sup> The degree of Tau-PET uptake can then be utilized to assign CU individuals on a continuum ranging from intermediate (i.e., "high/positive" plasma p-tau217, "low/negative" Tau-PET) to high

(i.e., “high/positive” results on both plasma p-tau217 and Tau-PET) risk for future progression. The final pre-screening decision will be based on factors such as the acceptable rate of screening failures, trial duration, expected effect size of the drug or intervention and whether the trial is a primary or secondary intervention strategy. The framework depicted in **Figure-3a** is primarily conceptual, and we recognize that numerous crucial decisions need to be made during its implementation. This includes, among other factors, determining the criteria for “high/positive” vs “low/negative” for both plasma p-tau217 and Tau-PET, deciding whether to use p-tau217 alone or in combination with other plasma biomarkers (e.g., A $\beta$ 42/40), identifying the target region-of-interest for Tau-PET quantification and selecting a quantitative threshold and/or visual read metric for Tau-PET.<sup>36,37</sup>

The main strength of this study is the multicenter approach that yielded a sufficient sample size for a robust head-to-head comparison between Tau-PET and plasma p-tau217 as well as a thorough assessment of their potential complementary value. The main limitations of the study are related to the inherent challenges of a multi-center study that was not co-designed from the start. We aimed to optimize pooling of data across cohorts by standardizing biomarkers values using CU A $\beta$ -negative participants. We acknowledge, however, that there may still be residual heterogeneity caused by use of different Amyloid-PET and Tau-PET tracers and different p-tau217 assays, as well as the use of different neuropsychological tests to generate mPACC5 scores. To mitigate this, we present both the pooled (main report) and cohort-specific (supplement) results. Moreover, we did not have plasma p-tau217 cut-offs available from all cohorts and instead used either continuous (z-scores) or categorical (quartiles) data for the analyses. Additionally, Tau-PET may have been at a slight disadvantage compared to plasma p-

tau217, as Tau-PET data were more often analyzed locally, whereas plasma p-tau217 was predominantly analyzed centrally at Lund University. Future studies using predefined cut-offs for both plasma p-tau217 and Tau-PET, preferentially in a more diverse population in terms of ethnicity, socioeconomic status and medical comorbidities, are of importance to establish the generalizability of our findings.

In summary, our data suggest that plasma p-tau217 and Tau-PET show similar associations with future cognitive decline and clinical progression in a CU population. We also showed that plasma p-tau217 and Tau-PET provide complimentary information and that a two-step approach (i.e., plasma p-tau217 followed by Tau-PET) substantially reduces the number of required Tau-PET scans and screened participants. Altogether, our data support the feasibility of a clinical trial design in which all participants undergo screening with plasma p-tau217, but only a subset with high/abnormal plasma p-tau217 will undergo Tau-PET.

**Table 1.** Participant characteristics

|                                   | All participants   | A $\beta$ + participants only |
|-----------------------------------|--------------------|-------------------------------|
| N                                 | 1534               | 413                           |
| Age, years                        | 68.4 $\pm$ 10.0    | 72.6 $\pm$ 8.2                |
| Sex, % female                     | 53.8               | 55.2                          |
| Education, years                  | 14.2 $\pm$ 3.3     | 13.8 $\pm$ 3.4                |
| MMSE score                        | 28.9 $\pm$ 1.2     | 28.6 $\pm$ 1.4                |
| <i>APOE e4</i> status, % carriers | 37.0               | 56.7                          |
| A $\beta$ -status, % positive     | 26.9               | 100                           |
| Follow-up duration, years         | 3.8 $\pm$ 1.8      | 3.6 $\pm$ 1.7                 |
| Follow-up visits, median (range)  | 3 (2-8)            | 3 (2-8)                       |
| Plasma p-tau217, z-score          | 0.43 $\pm$ 1.35    | 1.62 $\pm$ 1.46               |
| Tau-PET <sub>MTL</sub> , z-score  | 0.27 $\pm$ 1.40    | 1.27 $\pm$ 1.83               |
| Tau-PET <sub>NEO</sub> , z-score  | 0.18 $\pm$ 1.47    | 0.89 $\pm$ 2.17               |
| mPACC5, baseline score            | 0.05 $\pm$ 0.75    | -0.24 $\pm$ 0.77              |
| mPACC5, annual change             | -0.041 $\pm$ 0.079 | -0.12 $\pm$ 0.15              |
| % Progression to MCI              | 11.2               | 26.9                          |

Values represent means  $\pm$  standard deviations unless otherwise indicated. The following variables had missing data: A $\beta$  status (n=1, 0.1%), mPACC (n=142, 9.2%), MMSE (n=8, 0.5%), Progression to MCI (n=42, 2.7%).

A $\beta$  = Amyloid-beta, APOE = Apolipoprotein, MCI = Mild cognitive impairment, MMSE = Mini-Mental State Examination, mPACC5 = Modified preclinical Alzheimer cognitive composite, MTL = Medial temporal lobe, NEO = Neocortical, PET = Positron emission tomography.



**Figure 1.** Plasma p-tau217 and Tau-PET prediction of future cognitive decline

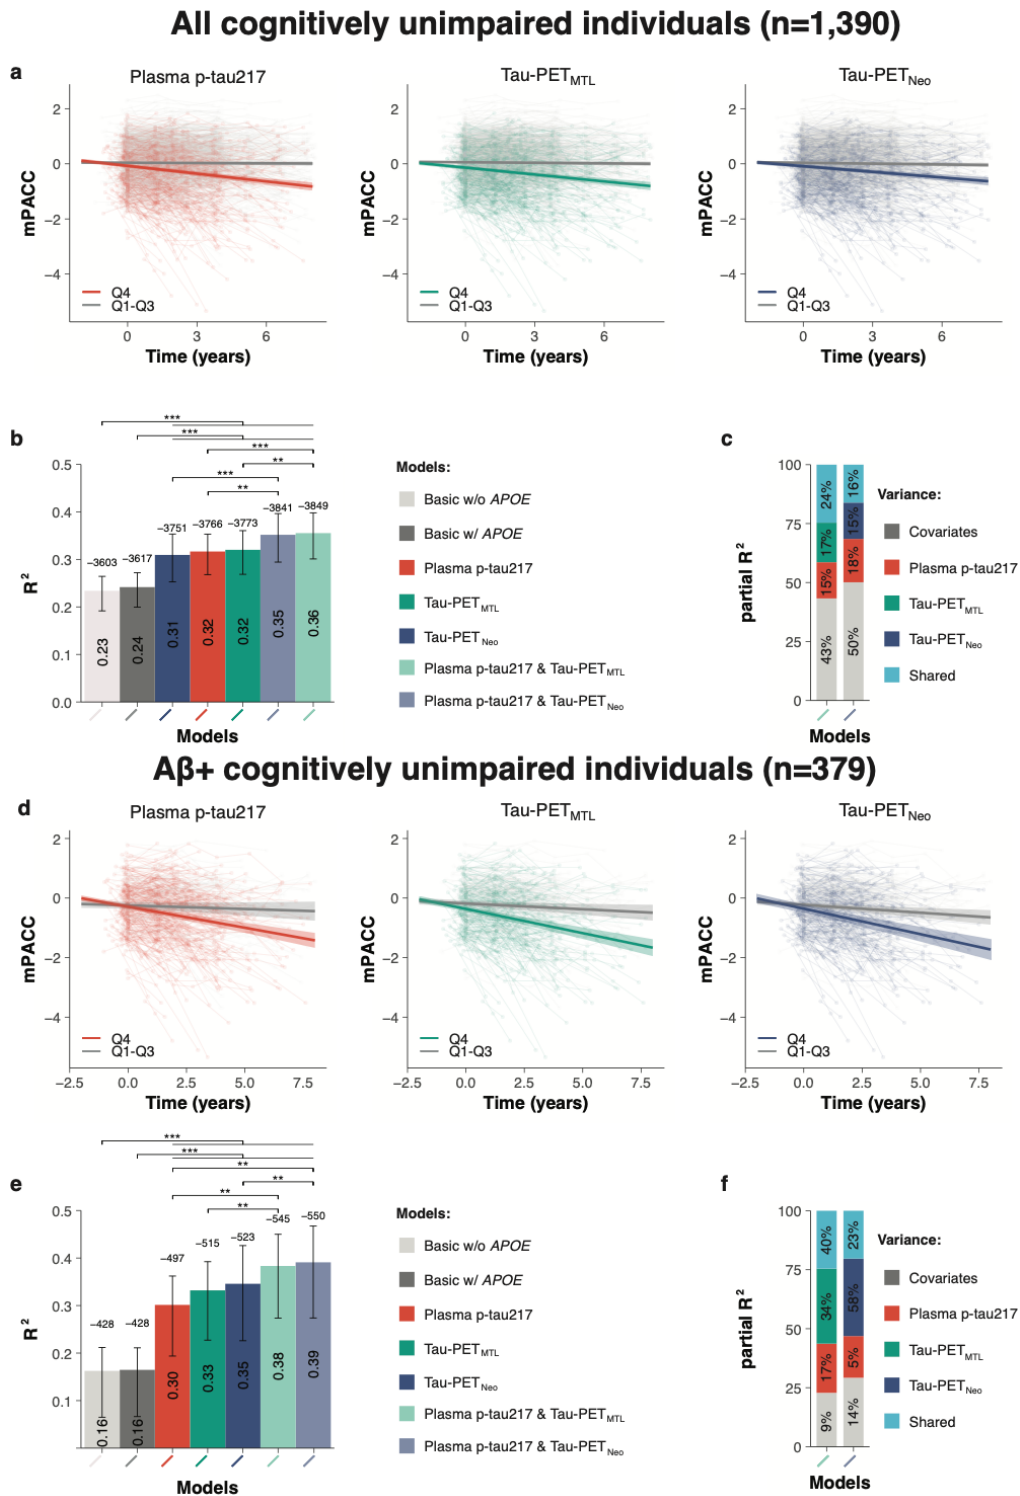

**a, d**, Scatterplots showing the association between cognitive change over time on the mPACC5 and the tau biomarkers (Quartile 1-3 vs Quartile 4) across all participants (**a**) and A $\beta$ + participants (**d**) only. The shadow area indicated the 95% confidence interval. **b, e**, Explained variance ( $R^2$ , inside the bar plot) and model fit (corrected Akaike criterion, outside the bar plot) for various models predicting longitudinal change on the mPACC5 across all participants (**b**) and A $\beta$ + (**e**) participants only. Errorbars represent the 95% CI. **c, f**, Partial explained variance ( $R^2$ ) for combined biofluid and neuroimaging models predicting longitudinal change on the mPACC5 across all participants (**c**) and A $\beta$ + (**f**) participants only. \*\* $p < 0.01$ , \*\*\* $p < 0.001$ .

**Figure 2.** Plasma p-tau217 and Tau-PET prediction of progression to mild cognitive impairment

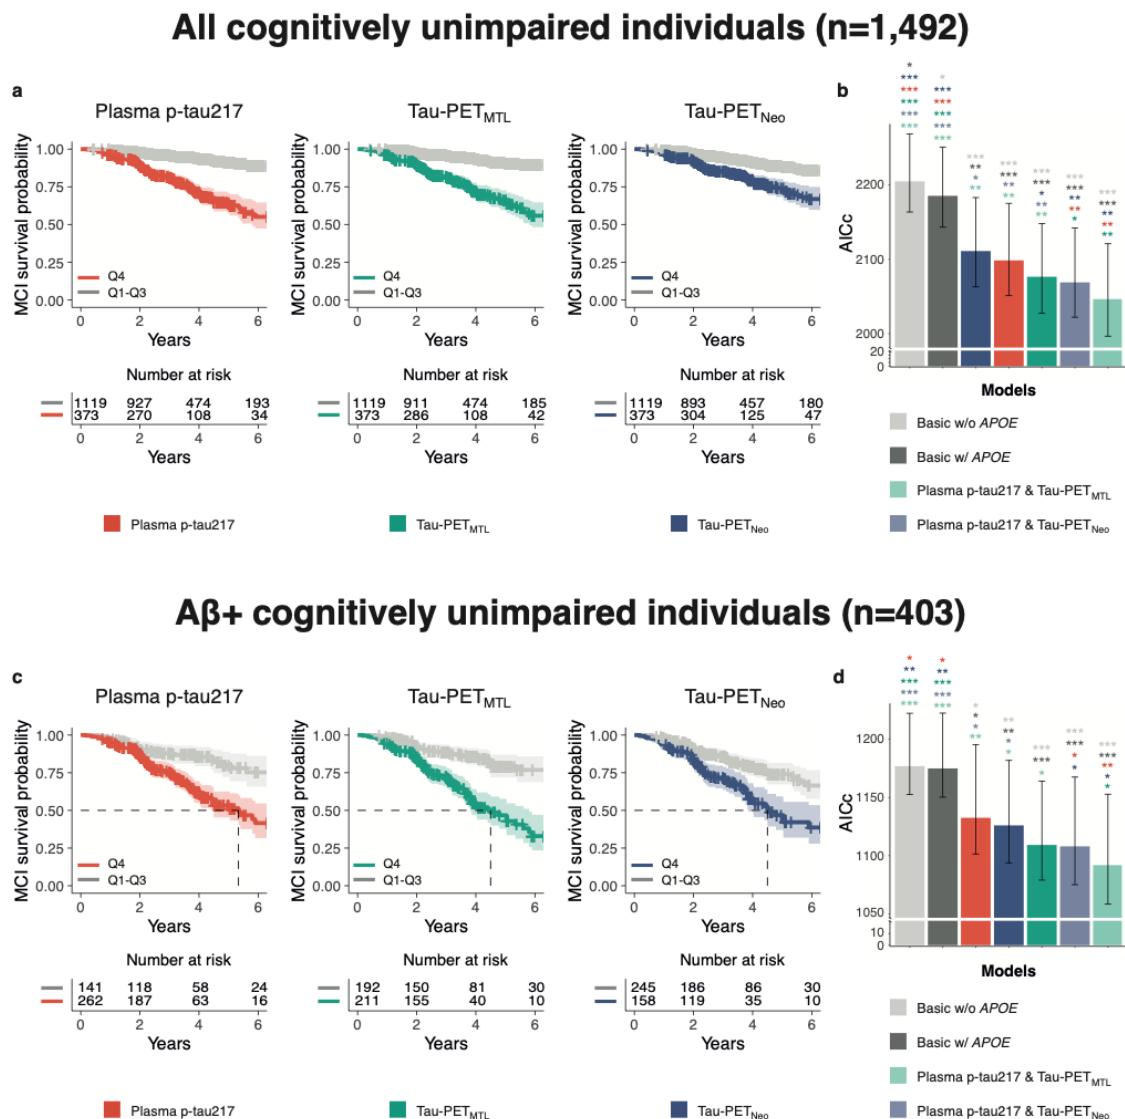

**a, c,** Survival curves for progression to mild cognitive impairment (Quartile 1-3 vs Quartile 4) across all participants (**a**) and  $A\beta^+$  (**c**) participants only, including a table of total number of participants available at each time point. The dashed line in **c** indicates the time point at which 50% of a group had progressed to MCI, and the shadow area indicated the 95% confidence interval. **b, d,** Model fit (corrected Akaike criterion) for various models predicting future clinical progression to mild cognitive impairment across all participants (**b**) and  $A\beta^+$  (**d**) participants only. Errorbars represent the 95% CI. \*  $p < 0.05$ , \*\*  $p < 0.01$ , \*\*\*  $p < 0.001$ .

**Figure 3.** A two-step recruitment approach for clinical trials in preclinical Alzheimer’s disease using the mPACC as outcome measure

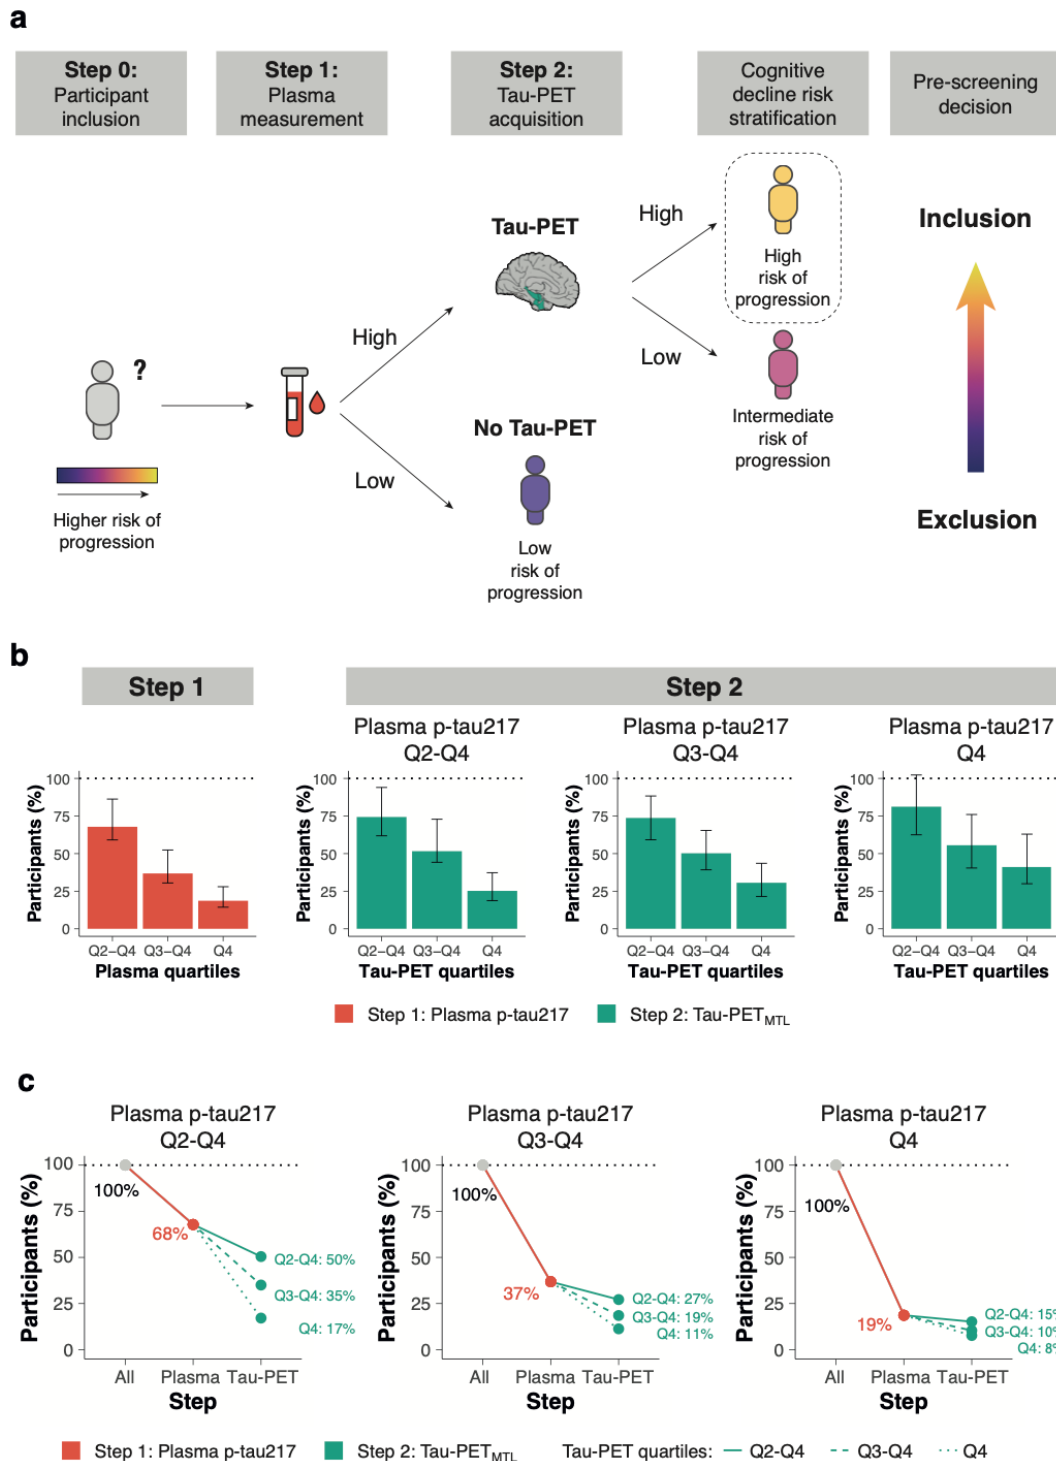

**a**, conceptual framework of a sequential two-step recruitment strategy of a clinical trial in preclinical Alzheimer’s disease using a cognitive endpoint. **b**, the obtained sample size reduction using sample selection based on different percentiles (75th, 50th and 25th) of baseline plasma p-tau217 levels in step 1 followed by the selection based on the same percentiles (75th, 50th and 25th) of the Tau-PET<sub>MTL</sub> measurement in step 2 with mPACC5 as the primary endpoint. Note that 100% in step 2 refers to the participants selected by plasma p-tau217 in step 1. Errorbars represent the 95% CI. **c** shows the calculated sample size reductions for various plasma p-tau217 and Tau-PET<sub>MTL</sub> quartile combinations

**Figure 4.** Clinical trial sample size reductions through a two-step recruitment strategy when using clinical progression to mild cognitive impairment as an outcome measure

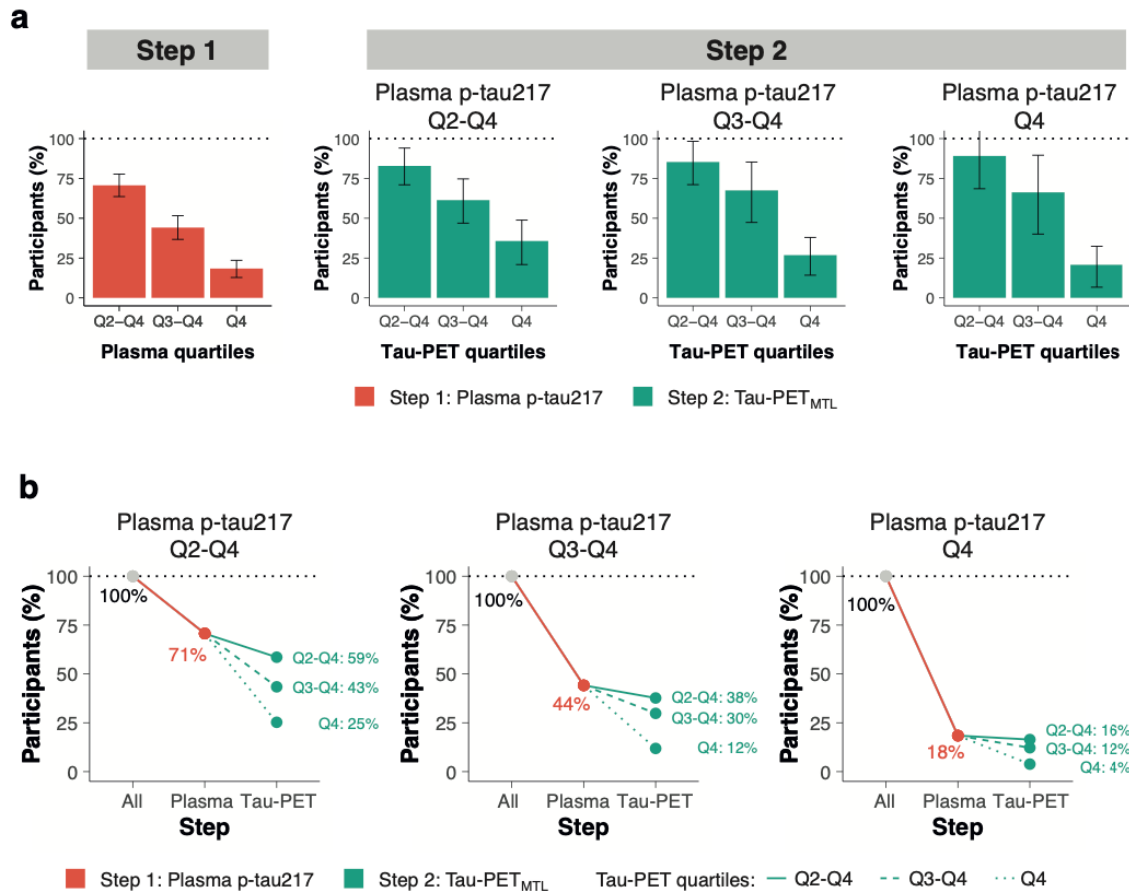

**a**, the obtained sample size reduction using sample selection based on different percentiles (75th, 50th and 25th) of baseline plasma p-tau217 levels in step 1 followed by the selection based on the same percentiles (75th, 50th and 25th) of the Tau-PET<sub>MTL</sub> measurement in step 2 with clinical progression to mild cognitive impairment as the primary endpoint. Note that 100% in step 2 refers to the participants selected by plasma p-tau217 in step 1. Errorbars represent the 95% CI. **b** shows the calculated sample size reductions for various plasma p-tau217 and Tau-PET<sub>MTL</sub> quartile combinations.

**Figure 5.** Characterization of different plasma p-tau<sub>217</sub>/Tau-PET<sub>MTL</sub> groups on relevant trial measures

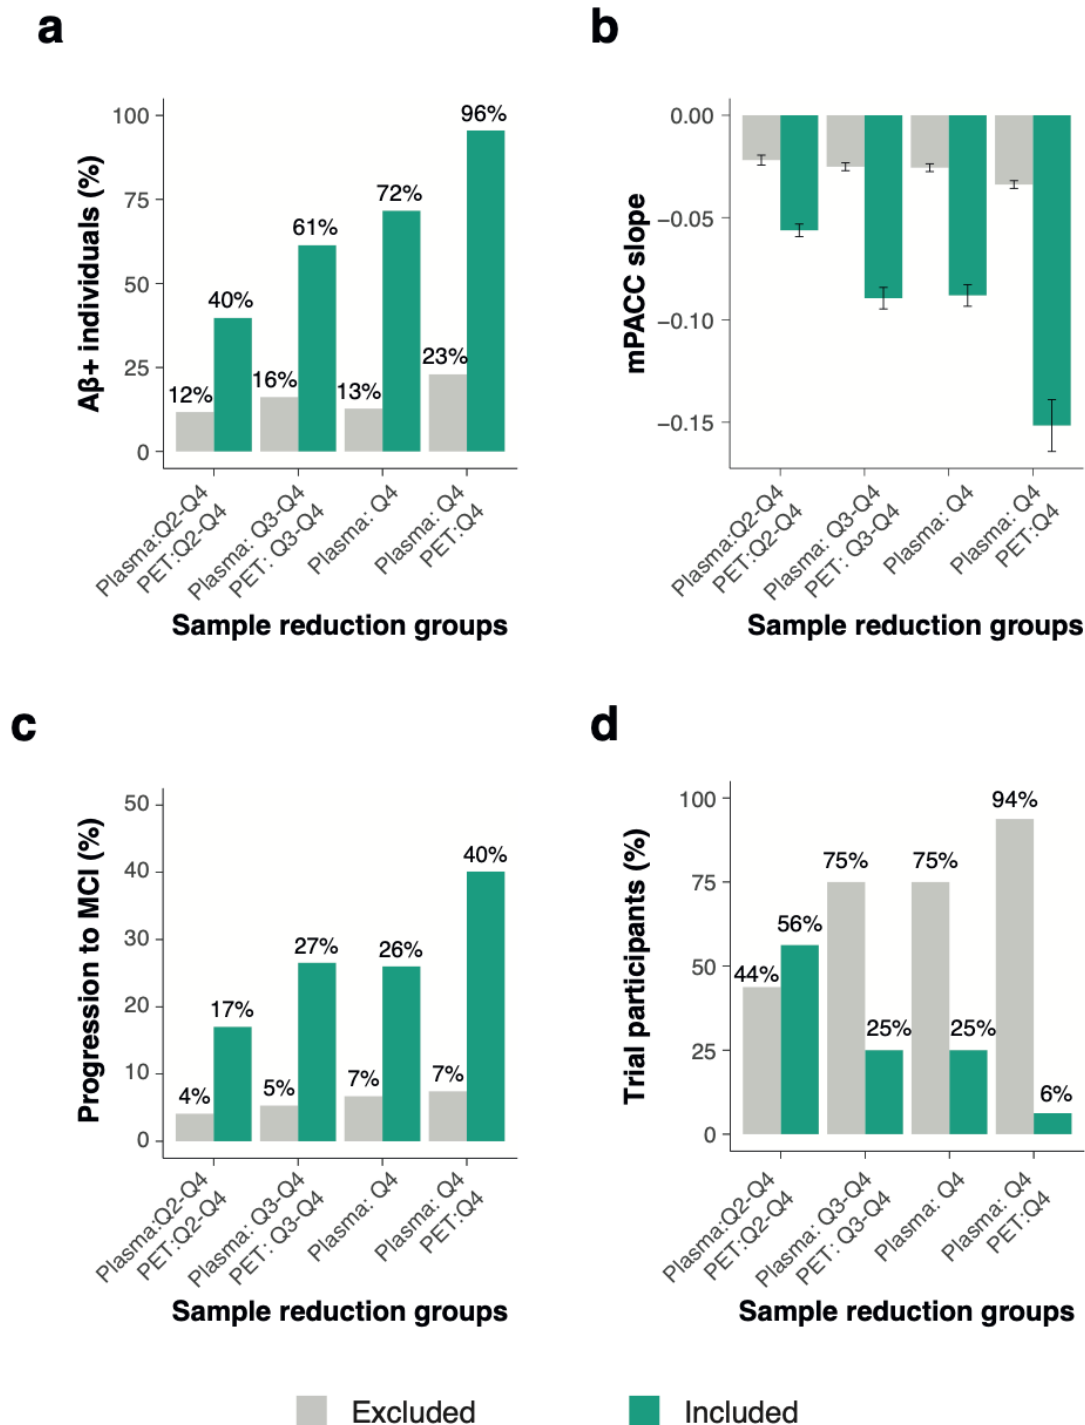

This figure shows how different group compositions based on their baseline plasma p-tau<sub>217</sub> and Tau-PET<sub>MTL</sub> levels are related to various relevant trial metrics, including the proportion of A $\beta$ <sup>+</sup> individuals (**a**), annual mPACC5 slope (**b**), proportion of initially cognitively unimpaired individuals that progress to mild cognitive impairment during a 4-year trial (**c**), and the proportion of individuals from the entire population that fall within the group definitions described on the x-axis (**d**). Errorbars in **b** represent the 95% CI.

## **CONTRIBUTORS**

RO, GS and OH designed the study. RO and GS had full access to raw data and carried out the statistical analyses. RO, GS and OH wrote the manuscript and had the final responsibility to submit for publication. All other authors contributed demographic, clinical, biomarker and neuroimaging data, contributed to the interpretation of the results and critically reviewed the manuscript.

## **DECLARATION OF INTERESTS**

R.O. has received research support from Avid Radiopharmaceuticals, Janssen Research & Development, Roche, Quanterix and Optina Diagnostics. He has given lectures in symposia sponsored by GE Healthcare and serves on advisory boards for Asceneuron and Bristol Myers Squibb.

SP has acquired research support (for the institution) from ki elements / ADDF and Avid. In the past 2 years, he has received consultancy/speaker fees from Bioartic, Biogen, Eisai, Lilly, and Roche.

Research programs of WF have been funded by ZonMW, NWO, EU-JPND, EU-IHI, Alzheimer Nederland, Hersenstichting CardioVascular Onderzoek Nederland, Health~Holland, Topsector Life Sciences & Health, stichting Dioraphte, Gieskes-Strijbis fonds, stichting Equilibrio, Edwin Bouw fonds, Pasman stichting, stichting Alzheimer & Neuropsychiatrie Foundation, Philips, Biogen MA Inc, Novartis-NL, Life-MI, AVID, Roche BV, Fujifilm, Eisai, Combinostics. WF holds the Pasman chair. WF is recipient of ABOARD, which is a public-private partnership receiving funding from ZonMW (#73305095007) and Health~Holland, Topsector Life Sciences & Health (PPP-

allowance; #LSHM20106). WF is recipient of TAP-dementia ([www.tap-dementia.nl](http://www.tap-dementia.nl)), receiving funding from ZonMw (#10510032120003) in the context of Onderzoeksprogramma Dementie, part of the Dutch National Dementia Strategy. TAP-dementia receives co-financing from Avid Radiopharmaceuticals and Amprion. Gieskes-Strijbis fonds also contributes to TAP-dementia. WF has been an invited speaker at Biogen MA Inc, Danone, Eisai, WebMD Neurology (Medscape), NovoNordisk, Springer Healthcare, European Brain Council. WF is consultant to Oxford Health Policy Forum CIC, Roche, Biogen MA Inc, and Eisai. WF participated in advisory boards of Biogen MA Inc, Roche, and Eli Lilly. WF is member of the steering committee of EVOKE/EVOKE+ (NovoNordisk). All funding is paid to her institution. WF is member of the steering committee of PAVE, and Think Brain Health. WF was associate editor of *Alzheimer, Research & Therapy* in 2020/2021. WF is associate editor at *Brain*.

EvdG has performed contract research for Heuron Inc. and Roche. EvdG has a consultancy agreement with IXICO and Life Molecular Imaging for reading PET scans.

CET has research contracts with Acumen, ADx Neurosciences, AC-Immune, Alamar, Aribio, Axon Neurosciences, Beckman-Coulter, BioConnect, Bioorchestra, Brainstorm Therapeutics, Celgene, Cognition Therapeutics, EIP Pharma, Eisai, Eli Lilly, Fujirebio, Instant Nano Biosensors, Novo Nordisk, Olink, PeopleBio, Quanterix, Roche, Toyama, Vivoryon. She is editor in chief of *Alzheimer Research and Therapy*, and serves on editorial boards of *Medidact Neurologie/Springer*, and *Neurology: Neuroimmunology & Neuroinflammation*. She had consultancy/speaker contracts for Eli Lilly, Merck, Novo Nordisk, Olink and Roche.

SES has served as a consultant to Eisai and Novo Nordisk and has received speaker fees from Eli Lilly and Medscape. She has analyzed biomarker data provided by C2N Diagnostics.

JT has served as a consultant for the Neurotorium educational platform and for Alzheon.

PR-N has served at scientific advisory boards and/or as a consultant for Roche, Novo Nordisk, Eisai, and Cerveau radiopharmaceuticals.

CCR has received research grants from NHMRC, Enigma Australia, Biogen, Eisai and Abbvie. He is on the scientific advisory board for Enigma/Mellieur Technologies and has consulted for Prothena, Eisai, Roche, and Biogen Australia.

RJB laboratory research funding from the National Institutes of Health, Alzheimer's Association, BrightFocus Foundation, Rainwater Foundation, Association for Frontotemporal Degeneration FTD Biomarkers Initiative, Avid Radiopharmaceuticals, Janssen, Tau Consortium, Novartis, Centene Corporation, Association for Frontotemporal Degeneration, the Cure Alzheimer's Fund, Coins for Alzheimer's Research Trust Fund, The Foundation for Barnes-Jewish Hospital, Good Ventures Foundation, DIAN-TU Pharma Consortium, Tau SILK Consortium (AbbVie, Biogen, Eli Lilly, and an anonymous organization), the NFL Consortium (AbbVie, Biogen, Bristol Meyers Squibb, Hoffman La Roche), and the Tracy Family SILQ Center; having equity ownership interest in C2N Diagnostics and receiving income based on technology licensed by Washington University to C2N Diagnostics; and receiving income from C2N Diagnostics for serving on the scientific advisory board.



OH has acquired research support (for the institution) from AVID Radiopharmaceuticals, Biogen, C2N Diagnostics, Eli Lilly, Eisai, Fujirebio, GE Healthcare, and Roche. In the past 2 years, he has received consultancy/speaker fees from AC Immune, Alzpath, BioArctic, Biogen, Bristol Meyer Squibb, Cerveau, Eisai, Eli Lilly, Fujirebio, Merck, Novartis, Novo Nordisk, Roche, Sanofi and Siemens. SCJ has served in the past two years on advisory boards for Enigma Biomedical and ALZPath.

The other authors report no competing interests.

#### **DATA AVAILABILITY**

Due to the multicenter design of the study, access to individual participant data from each cohort will have to be made available through the PIs of the respective cohorts. Generally, anonymised data can be shared by request from qualified academic investigators for the purpose of replicating procedures and results presented in the article, if data transfer is in agreement with the data protection regulation at the institution and is approved by the local Ethics Review Board.

#### **CODE AVAILABILITY**

The codes used for data analyses in our study can be requested from the corresponding authors (RO or OH).

#### **FUNDING**

Work at Lund University was supported by the National Institute of Aging (R01AG083740), European Research Council (ADG-101096455), Alzheimer's

Association (ZEN24-1069572, SG-23-1061717), GHR Foundation, Swedish Research Council (2022-00775, 2018-02052), ERA PerMed (ERAPERMED2021-184), Knut and Alice Wallenberg foundation (2022-0231), Strategic Research Area MultiPark (Multidisciplinary Research in Parkinson's disease) at Lund University, Swedish Alzheimer Foundation (AF-980907, AF-994229, AF-994075), Swedish Brain Foundation (FO2021-0293, FO2023-0163, FO2022-0204), Parkinson foundation of Sweden (1412/22), Cure Alzheimer's fund, Rönström Family Foundation (FRS-0003), Konung Gustaf V:s och Drottning Victorias Frimurarestiftelse, Skåne University Hospital Foundation (2020-O000028), Regionalt Forskningsstöd (2022-1259) Swedish federal government under the ALF agreement (2022-Projekt0080, 2022-Projekt0107), WASP and DDLS Joint call for research projects (WASP/DDLS22-066), BrightFocus Foundation (A2021013F), Fonds de recherche en Santé Québec (298314) The precursor of  $^{18}\text{F}$ -flortaucipir was provided by AVID radiopharmaceuticals and the precursor of  $^{18}\text{F}$ -RO948 was provided by Roche. The precursor of  $^{18}\text{F}$ -flutemetamol was sponsored by GE Healthcare. The MCSA is supported by the National Institute on Aging, U01 AG006786, GHR and the Alzheimer's Association. G.S. received funding from the European Union's Horizon 2020 Research and Innovation Program under Marie Skłodowska-Curie action grant agreement number 101061836, an Alzheimer's Association Research Fellowship (AARF-22-972612), the Alzheimerfonden (AF-980942), Greta och Johan Kocks research grants and travel grants from the Strategic Research Area MultiPark (Multidisciplinary Research in Parkinson's Disease) at Lund University.

R.O. has received research funding from European Research Council, ZonMw, NWO, National Institute of Health, Alzheimer Association, Alzheimer Nederland, Stichting

Dioraphte, Cure Alzheimer's fund, Health Holland, ERA PerMed, Alzheimerfonden, Hjarfonden.

Research of Alzheimer center Amsterdam is part of the neurodegeneration research program of Amsterdam Neuroscience. Alzheimer Center Amsterdam is supported by Stichting Alzheimer Nederland and Stichting Steun Alzheimercentrum Amsterdam. The chair of Wiesje van der Flier is supported by the Pasman stichting. The SCIENCE project receives funding from stichting Dioraphte and the Noaber foundation. Funding for amyloid PET scans was provided by AVID.

Research of CET is supported by the European Commission (Marie Curie International Training Network, grant agreement No 860197 (MIRIADE), Innovative Medicines Initiatives 3TR (Horizon 2020, grant no 831434) EPND (IMI 2 Joint Undertaking (JU), grant No. 101034344) and JPND (bPRIDE), National MS Society (Progressive MS alliance), CANTATE project funded by the Alzheimer Drug Discovery Foundation, Alzheimer Association, Health Holland, the Dutch Research Council (ZonMW), Alzheimer Drug Discovery Foundation, The Selfridges Group Foundation, Alzheimer Netherlands. CT is recipient of ABOARD, which is a public-private partnership receiving funding from ZonMW (#73305095007) and Health~Holland, Topsector Life Sciences & Health (PPP-allowance; #LSHM20106). CT is recipient of TAP-dementia, a ZonMw funded project (#10510032120003) in the context of the Dutch National Dementia Strategy.

EvdG has received research support from NWO, ZonMw, Hersenstichting, Alzheimer Nederland, Health~Holland and KWF.

The data contributed from the Wisconsin Registry for Alzheimer’s Prevention was supported by grant funding from the National Institute on Aging to the University of Wisconsin (R01 AG021155 and R01 AG027161 to SCJ).

Funding for data from Washington University was supported by National Institute on Aging grants R01AG070941 (S.E.S.), P30AG066444 (J.C.M.), P01AG003991 (J.C.M.), and P01AG026276 (J.C.M.). Blood plasma measurements were supported by RF1AG061900 (R.J.B), R56AG061900 (R.J.B.), and the Tracy Family SILQ Center (R.J.B.).

The data contributed from the PREVENT-AD was supported by public-private partnership funds provided by McGill University, the Fonds de Recherche du Québec – Santé (FRQ-S), an unrestricted research grant from Pfizer Canada, the Levesque Foundation, the Douglas Hospital Research Centre and Foundation, the Government of Canada, the Canada Fund for Innovation, the Canadian Institutes of Health Research, the Alzheimer Society of Canada, the National Institutes of Health of the United States, the Alzheimer Association and Brain Canada Foundation.

JT is funded by the Colin J. Adair Charitable Foundation fellowship. Funding for the TRIAD cohort comes from the Weston Brain Institute, Canadian Institutes of Health Research (CIHR) [MOP-11-51-31; RFN 152985, 159815, 162303], Canadian Consortium of Neurodegeneration and Aging (CCNA; MOP-11-51-31 -team 1), the Alzheimer’s Association [NIRG-12-92090, NIRP-12-259245], Brain Canada Foundation (CFI Project 34874; 33397), the Fonds de Recherche du Québec – Santé

(FRQS; Chercheur Boursier, 2020-VICO-279314), and the Colin J. Adair Charitable Foundation.

Data was obtained from Australian Imaging Biomarkers and Lifestyle flagship study of aging (AIBL) and the Australian Dementia Network funded by the National Health and Medical Research Council (NHMRC) of Australia (grants APP1132604, APP1140853 and APP1152623), a grant from Enigma Australia and support from the Commonwealth Scientific and Industrial Research Organization (CSIRO).

The funding sources had no role in the design and conduct of the study; in the collection, analysis, interpretation of the data; or in the preparation, review, or approval of the manuscript.

## REFERENCES

1. Hansson, O. Biomarkers for neurodegenerative diseases. *Nat Med* **27**, 954-963 (2021).
2. Strikwerda-Brown, C., *et al.* Association of Elevated Amyloid and Tau Positron Emission Tomography Signal With Near-Term Development of Alzheimer Disease Symptoms in Older Adults Without Cognitive Impairment. *JAMA Neurol* **79**, 975-985 (2022).
3. Ossenkoppele, R., *et al.* Discriminative Accuracy of [18F]flortaucipir Positron Emission Tomography for Alzheimer Disease vs Other Neurodegenerative Disorders. *JAMA* **320**, 1151-1162 (2018).
4. Jack, C.R., *et al.* The bivariate distribution of amyloid-beta and tau: relationship with established neurocognitive clinical syndromes. *Brain* **142**, 3230-3242 (2019).
5. Ossenkoppele, R., *et al.* Accuracy of Tau Positron Emission Tomography as a Prognostic Marker in Preclinical and Prodromal Alzheimer Disease: A Head-to-Head Comparison Against Amyloid Positron Emission Tomography and Magnetic Resonance Imaging. *JAMA Neurol* **78**, 961-971 (2021).
6. Pascoal, T.A., *et al.* 18F-MK-6240 PET for early and late detection of neurofibrillary tangles. *Brain* **143**, 2818-2830 (2020).
7. Leuzy, A., *et al.* Diagnostic Performance of RO948 F 18 Tau Positron Emission Tomography in the Differentiation of Alzheimer Disease From Other Neurodegenerative Disorders. *JAMA Neurol* **77**, 955-965 (2020).
8. Ossenkoppele, R. & Hansson, O. Towards clinical application of tau PET tracers for diagnosing dementia due to Alzheimer's disease. *Alzheimers Dement* **17**, 1998-2008 (2021).
9. Hansson, O., Blennow, K., Zetterberg, H. & Dage, J. Blood biomarkers for Alzheimer's disease in clinical practice and trials. *Nat Aging* **3**, 506-519 (2023).
10. Dore, V., *et al.* Plasma p217+tau versus NAV4694 amyloid and MK6240 tau PET across the Alzheimer's continuum. *Alzheimers Dement (Amst)* **14**, e12307 (2022).
11. Ashton, N.J., *et al.* Differential roles of Abeta42/40, p-tau231 and p-tau217 for Alzheimer's trial selection and disease monitoring. *Nat Med* **28**, 2555-2562 (2022).
12. Palmqvist, S., *et al.* Prediction of future Alzheimer's disease dementia using plasma phospho-tau combined with other accessible measures. *Nat Med* **27**, 1034-1042 (2021).
13. Barthelemy, N.R., *et al.* A soluble phosphorylated tau signature links tau, amyloid and the evolution of stages of dominantly inherited Alzheimer's disease. *Nat Med* **26**, 398-407 (2020).
14. Mila-Aloma, M., *et al.* Plasma p-tau231 and p-tau217 as state markers of amyloid-beta pathology in preclinical Alzheimer's disease. *Nat Med* **28**, 1797-1801 (2022).
15. Mielke, M.M., *et al.* Performance of plasma phosphorylated tau 181 and 217 in the community. *Nat Med* **28**, 1398-1405 (2022).
16. Thijssen, E.H., *et al.* Plasma phosphorylated tau 217 and phosphorylated tau 181 as biomarkers in Alzheimer's disease and frontotemporal lobar degeneration: a retrospective diagnostic performance study. *Lancet Neurol* **20**, 739-752 (2021).

17. Ossenkoppele, R., van der Kant, R. & Hansson, O. Tau biomarkers in Alzheimer's disease: towards implementation in clinical practice and trials. *Lancet Neurol* **21**, 726-734 (2022).
18. Salvado, G., *et al.* Specific associations between plasma biomarkers and postmortem amyloid plaque and tau tangle loads. *EMBO Mol Med* **15**, e17123 (2023).
19. Therriault, J., *et al.* Association of Phosphorylated Tau Biomarkers With Amyloid Positron Emission Tomography vs Tau Positron Emission Tomography. *JAMA Neurol* **80**, 188-199 (2023).
20. Smith, R., *et al.* Tau-PET is superior to phospho-tau when predicting cognitive decline in symptomatic AD patients. *Alzheimers Dement* **19**, 2497-2507 (2023).
21. Mundada, N.S., *et al.* Head-to-head comparison between plasma p-tau217 and flortaucipir-PET in amyloid-positive patients with cognitive impairment. *Alzheimers Res Ther* **15**, 157 (2023).
22. Feizpour, A., *et al.* Two-Year Prognostic Utility of Plasma p217+tau across the Alzheimer's Continuum. *J Prev Alzheimers Dis* **10**, 828-836 (2023).
23. van Dyck, C.H., *et al.* Lecanemab in Early Alzheimer's Disease. *N Engl J Med* **388**, 9-21 (2023).
24. Sims, J.R., *et al.* Donanemab in Early Symptomatic Alzheimer Disease: The TRAILBLAZER-ALZ 2 Randomized Clinical Trial. *JAMA* **330**, 512-527 (2023).
25. Papp, K.V., Rentz, D.M., Orlovsky, I., Sperling, R.A. & Mormino, E.C. Optimizing the preclinical Alzheimer's cognitive composite with semantic processing: The PACC5. *Alzheimers Dement (N Y)* **3**, 668-677 (2017).
26. Sperling, R.A., *et al.* Trial of Solanezumab in Preclinical Alzheimer's Disease. *N Engl J Med* **389**, 1096-1107 (2023).
27. Workgroup, A.s.A. Revised Criteria for Diagnosis and Staging of Alzheimer's Disease: Alzheimer's Association Workgroup. ([https://alz.org/media/Documents/scientific-conferences/Clinical-Criteria-for-Staging-and-Diagnosis-for-Public-Comment-Draft-2.pdf?\\_gl=1\\*\\_exh9z4\\*\\_ga\\*MjA5MDIzNzc5My4xNzAwMjQyMDgy\\*\\_ga\\_QSF7KCEH7C\\*MTcwMTEyMjk5MC40LjEuMTcwMTEyMzIyOS42MC4wLjA.\\*\\_ga\\_9JTEWVX24V\\*MTcwMTEyMjk5MC40LjEuMTcwMTEyMzIyOS42MC4wLjA](https://alz.org/media/Documents/scientific-conferences/Clinical-Criteria-for-Staging-and-Diagnosis-for-Public-Comment-Draft-2.pdf?_gl=1*_exh9z4*_ga*MjA5MDIzNzc5My4xNzAwMjQyMDgy*_ga_QSF7KCEH7C*MTcwMTEyMjk5MC40LjEuMTcwMTEyMzIyOS42MC4wLjA.*_ga_9JTEWVX24V*MTcwMTEyMjk5MC40LjEuMTcwMTEyMzIyOS42MC4wLjA)).
28. Mattsson-Carlsson, N., *et al.* Longitudinal plasma p-tau217 is increased in early stages of Alzheimer's disease. *Brain* **143**, 3234-3241 (2020).
29. Montoliu-Gaya, L., *et al.* Optimal blood tau species for the detection of Alzheimer's disease neuropathology: an immunoprecipitation mass spectrometry and autopsy study. *Acta Neuropathol* **147**, 5 (2023).
30. Salvado, G., *et al.* Cerebral amyloid-beta load is associated with neurodegeneration and gliosis: Mediation by p-tau and interactions with risk factors early in the Alzheimer's continuum. *Alzheimers Dement* **17**, 788-800 (2021).
31. Marquie, M., *et al.* Validating novel tau positron emission tomography tracer [F-18]-AV-1451 (T807) on postmortem brain tissue. *Ann Neurol* **78**, 787-800 (2015).
32. Fleisher, A.S., *et al.* Positron Emission Tomography Imaging With [18F]flortaucipir and Postmortem Assessment of Alzheimer Disease Neuropathologic Changes. *JAMA Neurol* **77**, 829-839 (2020).



33. Lowe, V.J., *et al.* Tau-positron emission tomography correlates with neuropathology findings. *Alzheimers Dement* **16**, 561-571 (2020).
34. Ossenkoppele, R., *et al.* Amyloid and tau PET-positive cognitively unimpaired individuals are at high risk for future cognitive decline. *Nat Med* **28**, 2381-2387 (2022).
35. Brum, W.S., *et al.* A blood-based biomarker workflow for optimal tau-PET referral in memory clinic settings. *Nat Commun* **15**, 2311 (2024).
36. Mattsson-Carlsson, N., *et al.* Plasma Biomarker Strategy for Selecting Patients With Alzheimer Disease for Anti-amyloid Immunotherapies. *JAMA Neurol* **81**, 69-78 (2024).
37. Villemagne, V.L., *et al.* CenTauR: Toward a universal scale and masks for standardizing tau imaging studies. *Alzheimers Dement (Amst)* **15**, e12454 (2023).
38. Ossenkoppele, R., *et al.* Associations between tau, Aβ, and cortical thickness with cognition in Alzheimer disease. *Neurology* **92**, e601-e612 (2019).
39. Roberts, R.O., *et al.* The Mayo Clinic Study of Aging: design and sampling, participation, baseline measures and sample characteristics. *Neuroepidemiology* **30**, 58-69 (2008).
40. Fowler, C., *et al.* Fifteen Years of the Australian Imaging, Biomarkers and Lifestyle (AIBL) Study: Progress and Observations from 2,359 Older Adults Spanning the Spectrum from Cognitive Normality to Alzheimer's Disease. *J Alzheimers Dis Rep* **5**, 443-468 (2021).
41. Slot, R.E.R., *et al.* Subjective Cognitive Impairment Cohort (SCIENCe): study design and first results. *Alzheimers Res Ther* **10**, 76 (2018).
42. Jack, C.R., Jr., *et al.* Defining imaging biomarker cut points for brain aging and Alzheimer's disease. *Alzheimers Dement* **13**, 205-216 (2017).
43. Palmqvist, S., *et al.* Discriminative Accuracy of Plasma Phospho-tau217 for Alzheimer Disease vs Other Neurodegenerative Disorders. *JAMA* **324**, 772-781 (2020).
44. Groot, C., *et al.* Diagnostic and prognostic performance to detect Alzheimer's disease and clinical progression of a novel assay for plasma p-tau217. *Alzheimers Res Ther* **14**, 67 (2022).
45. Donohue, M.C., *et al.* The preclinical Alzheimer cognitive composite: measuring amyloid-related decline. *JAMA Neurol* **71**, 961-970 (2014).
46. Petersen, R.C. Mild cognitive impairment as a diagnostic entity. *J Intern Med* **256**, 183-194 (2004).
47. Petersen, R.C., *et al.* Practice guideline update summary: Mild cognitive impairment: Report of the Guideline Development, Dissemination, and Implementation Subcommittee of the American Academy of Neurology. *Neurology* **90**, 126-135 (2018).



## METHODS

### *Participants*

We included 1534 participants from the Swedish BioFINDER-1 (n=39, NCT01208675) and BioFINDER-2 (n=481, NCT03174938) studies at Lund University<sup>7,38</sup>, the Mayo Clinic Olmsted Study of Aging<sup>39</sup> (MCSA, n=363), the Australian Imaging Biomarkers and Lifestyle Study of Ageing<sup>40</sup> (AIBL, n=180), the Knight ADRC at Washington University (n=109), the Translational Biomarkers in Aging and Dementia (TRIAD, n=124) and the PRE-symptomatic EVALuation of Experimental or Novel Treatments for Alzheimer's Disease (PREVENT-AD, n=112) at McGill University, the Wisconsin Registry for Alzheimer's Prevention (WRAP, n=82) at the University of Wisconsin-Madison, and the SCIENCe project<sup>41</sup>, which is part of the Amsterdam Dementia Cohort (ADC, n=44). A brief description of each cohort is provided in **Extended-Data Table-12**. All participants were i) cognitively unimpaired at baseline defined by neuropsychological test scores within the normative range given an individuals' age, sex and educational background, ii) had Amyloid-PET available to determine A $\beta$  status, iii) underwent a Tau-PET scan and blood sampling within a maximum 1 year interval, and iv) had at least one clinical follow-up visit available. Follow-up data was collected until November 1<sup>st</sup>, 2023. Written informed consent was obtained from all participants and local institutional review boards for human research approved the study.

### *Amyloid-PET status*

A $\beta$  status was determined using center-specific cut-offs or visual read metrics using [<sup>18</sup>F]flutemetamol PET for BioFINDER-1 and BioFINDER-2, [<sup>11</sup>C]Pittsburgh compound-B PET for MCSA, Knight ADRC and WRAP, [<sup>18</sup>F]florbetapir PET for ADC,

and [<sup>18</sup>F]NAV4694 for TRIAD, PREVENT-AD and AIBL, see **Extended-Data Table-13** for details.

#### *Tau PET*

Tau-PET was performed using [<sup>18</sup>F]flortaucipir for BioFINDER-1, MSCA, Knight ADRC, and ADC cohorts, using [<sup>18</sup>F]MK6240 for TRIAD, AIBL and WRAP and using [<sup>18</sup>F]RO948 for BioFINDER-2. Data were centrally processed at Lund University for BioFINDER-1, BioFINDER-2, and ADC, and locally processed for the other cohorts, following previously described procedures (see **Extended-Data Table-14**). In line with our previous study<sup>34</sup>, we generated Tau-PET standardized uptake value ratios (SUVR) for a medial temporal lobe (MTL; unweighted average of bilateral entorhinal cortex and amygdala) and a neocortical temporal (NEO; weighted average of bilateral middle temporal and inferior temporal gyri) region-of-interest.<sup>3,42</sup>

#### *Plasma p-tau217*

Plasma p-tau217 levels were measured using an immunoassay developed by Lilly Research Laboratories (IN, USA) on a Meso Scale Discovery platform at Lund University for BioFINDER-1, BioFINDER-2, ADC, WRAP, PREVENT-AD and Knight ADRC<sup>43</sup> and at the Mayo Clinic for MSCA<sup>15</sup>. For AIBL and TRIAD a plasma p-tau217+ assay developed by Janssen R&D (CA, USA) on a Single Molecule Array (Simoa) HD-X platform was used.<sup>22</sup> The correspondence between the two plasma p-tau217 assays used in this study have been shown to be high in a direct head-to-head comparisons study.<sup>44</sup>

#### *Clinical outcome measures*

We used both continuous and binary measures of clinical progression. First, we examined cognitive trajectories using a sensitive composite measure specifically developed to detect cognitive changes in preclinical stages of AD (i.e., the modified preclinical Alzheimer cognitive composite 5 [mPACC5<sup>25,45</sup>]). The mPACC5 consists of tests capturing episodic memory, executive function, semantic memory and global cognition.<sup>25</sup> Individual neuropsychological tests were z-transformed using the baseline test scores of A $\beta$ -negative participants in each cohort as reference group and then averaged to obtain a composite z-score. The composition of the mPACC5 for each cohort is described in **Extended-Data Table-15**. Second, we examined progression from CU to MCI. MCI was established using the Petersen criteria<sup>46</sup> and is defined as significant cognitive symptoms as assessed by a physician, in combination with cognitive impairment on one or multiple domains (e.g., memory, executive functioning, attention, language) that is below the normative range given an individuals' age, sex and educational background, but not sufficiently severe to meet diagnostic criteria for dementia.<sup>47</sup>

### *Statistical analyses*

All statistical analyses were performed in R version 4.3.1. Statistical significance for all models was set at  $p < 0.05$  two-sided, without correction for multiple comparisons. To enable pooling of the data across cohorts, we z-transformed both Tau-PET SUVR's and plasma p-tau<sub>217</sub> concentrations based on the mean and the standard deviation of the A $\beta$  negative participants within each cohort. We conducted two sets of main analyses, in which we examined i) the individual and combined utility of the tau biomarkers for their associations with longitudinal cognitive decline on the mPACC5 and with clinical progression from CU to MCI, and ii) a sequential two-step approach for participant selection in a preclinical AD trial with a cognitive endpoint.

### Tau-PET and plasma p-tau217 vs mPACC5 change and progression to MCI

Within these analyses, we performed three different statistical models, including i) only plasma p-tau217 concentration as a (continuous) predictor, ii) only a Tau-PET measure as (continuous) predictor (i.e., Tau-PET<sub>MTL</sub> or Tau-PET<sub>NEO</sub> SUVR), or iii) including plasma p-tau217 and one of the Tau-PET measures (i.e., Tau-PET<sub>MTL</sub> or Tau-PET<sub>NEO</sub> SUVR) simultaneously as predictors. Additionally, we tested two basic models, model 1 including age, sex, years of education and cohort, and model 2 consisting of the model 1 variables and *APOE*  $\epsilon$ 4 carriership. We calculated change in mPACC5 using linear mixed models with random time slopes and random intercept using the *lme4* package. Subsequently, these slopes were entered as the dependent variable in linear regression models with plasma p-tau217 and/or Tau-PET as predictors, while adjusting for age, sex, education, cohort and *APOE*  $\epsilon$ 4 carriership. Differences in model performance was assessed by comparing differences in  $R^2$  by bootstrapping (1,000 repetitions with resample, *boot* package). Partial  $R^2$  were calculated to assess the specific contribution of each predictor in the combined plasma p-tau217 and Tau-PET models (*rsq* package).

Next, we examined progression from cognitively unimpaired to MCI using Cox proportional hazard models, adjusting for age, sex, years of education, *APOE*- $\epsilon$ 4 carriership and cohort using the continuous variables as predictors. For individuals who progressed to MCI we used the respective times at diagnostic progression to MCI for the analyses. To compare the predictive value of Tau-PET vs plasma p-tau217 for diagnostic conversion, we compared the difference in AICc using bootstrapping procedures (1,000 repetitions with resample). In secondary analyses, all the above-mentioned analyses were repeated in  $A\beta$  positive participants.

To assess potential differences between cohorts we performed several sensitivity analyses. First, for the associations between the tau biomarkers and mPACC5 decline we examined the effect sizes and total variance explained in all the previous models for each cohort independently (**Extended-Data Figures-2/3**). To that end, we applied the same linear regression models used in the main analyses to each cohort separately, without including cohort as a covariate. Similarly, we performed Cox proportional hazards models in all cohorts independently to calculate the hazard ratios and C-indices (**Extended-Data Figures-4/5**). Finally, we calculated the root mean square error (RMSE) of the predictions for each cohort when it was excluded from the training set. To do this, we calculated the cognition slopes for all cohorts combined, regressed out the cohort variable using a linear regression model, and then trained a model (with age, sex, and *APOE* as covariates) on all cohorts except one, subsequently predicting cognitive decline in the excluded cohort. We then calculated the RMSE from the difference between the predicted vs the observed data.

#### A two-step approach for participant selection in a preclinical AD trial

To derive optimal sample size reduction for a clinical trial, we generated a data-driven estimate of the complementary value of Tau-PET and plasma p-tau217 when implementing a sequential two-step approach (i.e., plasma p-tau217 first, followed by Tau-PET). First, we calculated the obtained sample size reduction when assuming 80% power to detect a 30% change in cognitive change (mPACC5) in a 4-year clinical trial (with annual repeated testing). Sample size was then defined by using different percentiles (75th, 50th and 25th) of the participants' baseline plasma p-tau217 levels using the *lmpower* function in the *longpower* package. The approach was repeated selecting the

75th, 50th and 25th percentiles of the new participants' Tau-PET measures. Percentage of participants needed compared to the entire study population and the plasma-selected sample are reported. Similar analyses were performed for progression to MCI, using the *ssizeCT.default* function from the *powerSurvEpi* package. In this analysis, we aimed to detect a 30% reduction of events (i.e., progression to MCI) at 80% power.

Next, we compared the characteristics of the sample included and excluded from the hypothetical clinical trial based on the different approaches presented. We focused on four combinations based on the participants selected on their plasma p-tau217 (step 1) and the Tau-PET<sub>MTL</sub> (step 2) levels, i.e., A) a “liberal” group comprising quartile 2 to quartile 4 (Q2-Q4) of plasma p-tau217 levels and Q2-Q4 of Tau-PET of those selected by plasma, B) a “moderate” group consisting of individuals within Q3-Q4 of plasma p-tau217 levels and Q3-Q4 of Tau-PET of those selected by plasma, C) plasma p-tau217 Q4-only, and D) a “conservative” group consisting of individuals within Q4 of plasma p-tau217 levels and Q4 of Tau-PET of those selected by plasma. We compared the proportion of A $\beta$ -positivity, the mPACC slopes, the proportion of progressors to MCI and the final number of participants included based on the selection criteria between these groups. Finally, we investigated the percentage of cost reductions of such approaches for participant selection in a hypothetical clinical trial using either mPACC5 or progression to MCI as the outcome measure assuming 80% power to detect a 30% change mPACC5 or progression to MCI in a 4-year clinical trial (with annual repeated clinical assessments). We provided percentage cost reductions using different ratios of costs for Tau-PET vs plasma p-tau217; 1:5 (i.e., cost of 1 Tau-PET scan resembling 5 plasma p-tau217 assessments), 1:10, 1:15 and 1:20.
